# Supplementary figures and images for: Financial Toxicity in Japanese Patients with Metastatic Renal Cell Carcinoma: A Cross-Sectional Study
Source: MDPI journal article supplement (doi:10.3390/cancers16101904), 2024-05-16

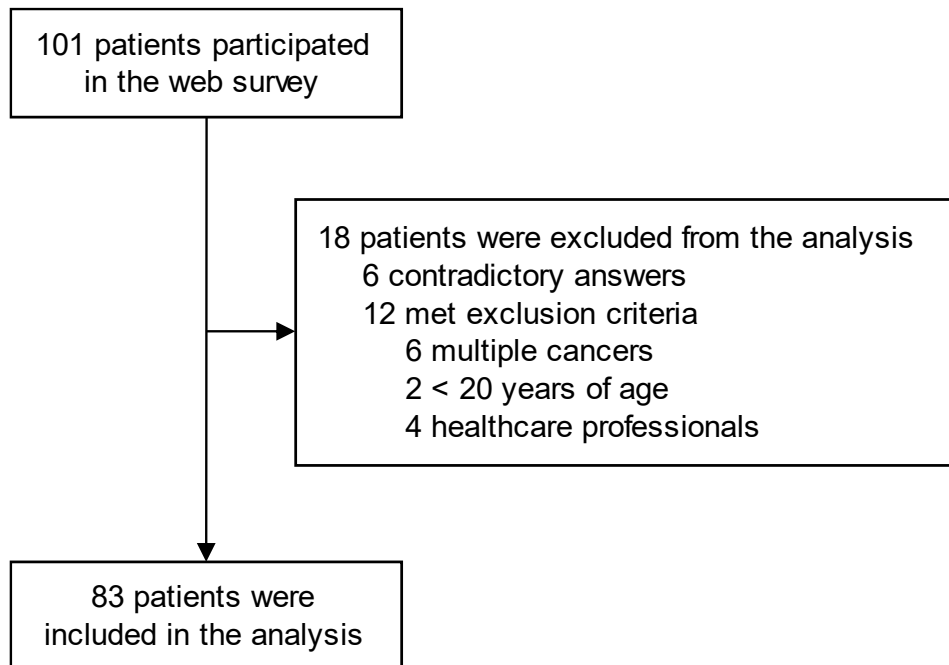

**Figure S1. Flowchart showing recruitment of patients.**

Supplement: s1 [file s1]
